# Supplementary material for: Contribution of telomerase RNA retrotranscription to DNA double-strand break repair during mammalian genome evolution
Source: PubMed Central journal article supplement (PMC2246262; doi:10.1186/gb-2007-8-12-r260), 2007-12-07
Supplement: gb-2007-8-12-r260-S2.pdf [file gb-2007-8-12-r260-S2.pdf]

**Additional data file 2**

**Table S1 - Mouse ITS loci for which the orthologous rat loci were not found or were grossly rearranged**

|     | Chromosomal localization | Starting nucleotide of ITS | ITS length (mismatches) |
|-----|--------------------------|----------------------------|-------------------------|
| 1.  | MMU1qA3                  | 19394041                   | 66 (0)                  |
| 2.  | MMU1qA5                  | 22802343                   | 71 (0)                  |
| 3.  | MMU1qC3                  | 69750882                   | 272 (32)                |
| 4.  | MMU1qE1                  | 100530522                  | 79 (0)                  |
| 5.  | MMU1qF                   | 142388935                  | 29 (1)                  |
| 6.  | MU1qH6                   | 195019658                  | 62 (0)                  |
| 7.  | MU2qA3                   | 19551428                   | 98 (4)                  |
| 8.  | MMU2qB                   | 46157961                   | 62 (0)                  |
| 9.  | MMU2qC1                  | 57555029                   | 239 (3)                 |
| 10. | MMU2qF1                  | 23517609                   | 69 (3)                  |
| 11. | MMU3qF2                  | 99742313                   | 130 (10)                |
| 12. | MMU4qC5                  | 89701680                   | 61 (0)                  |
| 13. | MMU4qE2                  | 153937277                  | 35 (1)                  |
| 14. | MMU5qC2                  | 59650041                   | 56 (0)                  |
| 15. | MMU5qC3                  | 73581821                   | 83 (5)                  |
| 16. | MMU5qE5                  | 105238493                  | 84 (1)                  |
| 17. | MMU5qF                   | 109125203                  | 78 (0)                  |
| 18. | MMU5qF                   | 120766398                  | 27 (1)                  |
| 19. | MMU6qB3                  | 53941497                   | 80 (4)                  |
| 20. | MMU6qB3                  | 56377984                   | 89 (0)                  |
| 21. | MMU6qC1*                 | 68259674                   | 93 (0)                  |
| 22. | MMU6qG1                  | 133941357                  | 77 (1)                  |
| 23. | MMU7qA3                  | 18665269                   | 39 (1)                  |
| 24. | MMU7qD3                  | 80676175                   | 60 (0)                  |
| 25. | MMU7qF3                  | 126265763                  | 138 (13)                |
| 26. | MMU8qB3                  | 70582624                   | 94 (3)                  |
| 27. | MMU9qB                   | 54097897                   | 55 (6)                  |
| 28. | MMU10qA1                 | 5890276                    | 61 (1)                  |
| 29. | MMU10qA3                 | 22087991                   | 26 (0)                  |
| 30. | MMU10qB1                 | 37891919                   | 89 (1)                  |
| 31. | MMU10qB4                 | 62225144                   | 73 (3)                  |
| 32. | MMU10qB5                 | 72348109                   | 36 (3)                  |
| 33. | MMU11qA5                 | 40564304                   | 55 (0)                  |
| 34. | MMU11qB1                 | 57028264                   | 100 (3)                 |
| 35. | MMU12qD3                 | 88995411                   | 281 (6)                 |
| 36. | MMU12qF2                 | 110916476                  | 27 (0)                  |
| 37. | MMU13qA1                 | 14452896                   | 50 (0)                  |
| 38. | MMU13qA2                 | 18363199                   | 64 (4)                  |
| 39. | MMU14qE3                 | 104200103                  | 65 (0)                  |
| 40. | MMU14qE4                 | 107062695                  | 69 (0)                  |
| 41. | MMU14qE5                 | 118012404                  | 63 (0)                  |
| 42. | MMU15qF1                 | 100992889                  | 40 (0)                  |
| 43. | MMU16qA1                 | 3010722                    | 91 (6)                  |
| 44. | MMU16qC4                 | 95783045                   | 39 (0)                  |
| 45. | MMU17qA1                 | 10642846                   | 32 (0)                  |
| 46. | MMU17qA3                 | 29500895                   | 50 (0)                  |
| 47. | MMU17qC                  | 50686703                   | 156 (4)                 |
| 48. | MMU17qE5                 | 91027485                   | 73 (1)                  |
| 49. | MMU17qE5                 | 91628758                   | 67 (1)                  |
| 50. | MMU18qA1                 | 7076430                    | 81 (0)                  |
| 51. | MMUXqA1                  | 17995996                   | 54 (0)                  |
| 52. | MMUXqA6                  | 59154576                   | 40 (2)                  |
| 53. | MMU1qC1                  | 44497146                   | 65 (1)                  |
| 54. | MMU1qG1                  | 149394768                  | 28 (0)                  |
| 55. | MMU1qG1                  | 147608149                  | 74 (5)                  |
| 56. | MMU1qH4                  | 178494371                  | 67 (1)                  |
| 57. | MMU2qB                   | 41828439                   | 140 (5)                 |
| 58. | MMU2qC1                  | 144459165                  | 55 (0)                  |
| 59. | MMU3qF1                  | 87169949                   | 47 (2)                  |
| 60. | MMU3qG1                  | 114601741                  | 86 (4)                  |
| 61. | MMU3qG2                  | 127141085                  | 82 (0)                  |
| 62. | MMU3qH3                  | 148031423                  | 276 (17)                |
| 63. | MMU4qA3                  | 25607856                   | 69 (0)                  |
| 64. | MMU4qA5                  | 31538583                   | 121 (5)                 |
| 65. | MMU4qB1                  | 46396183                   | 39 (3)                  |
| 66. | MMU4qC5                  | 92819479                   | 100 (2)                 |

|      |           |           |          |
|------|-----------|-----------|----------|
| 67.  | MMU5qE1   | 79753757  | 107 (3)  |
| 68.  | MMU5qE5   | 106229832 | 37 (0)   |
| 69.  | MMU5qG2   | 135374985 | 28 (0)   |
| 70.  | MMU5qG2   | 136577105 | 56 (1)   |
| 71.  | MMU5qG2   | 143273417 | 55 (0)   |
| 72.  | MMU5qG3   | 146503825 | 236 (10) |
| 73.  | MMU5qG3   | 147941306 | 29 (0)   |
| 74.  | MMU6qA1   | 4877085   | 426 (20) |
| 75.  | MMU6qB1   | 146222214 | 42 (0)   |
| 76.  | MMU6qC1   | 65319212  | 33 (0)   |
| 77.  | MMU6qG1   | 136249298 | 62 (4)   |
| 78.  | MMU6qG3   | 146222214 | 42 (1)   |
| 79.  | MMU6qG3   | 149461913 | 46 (2)   |
| 80.  | MMU7qA2   | 15902452  | 126 (7)  |
| 81.  | MMU7qB1   | 30112225  | 69 (1)   |
| 82.  | MMU8qA4   | 33933969  | 99 (0)   |
| 83.  | MMU8qA4   | 36584734  | 51 (2)   |
| 84.  | MMU8qC3   | 87872719  | 55 (0)   |
| 85.  | MMU8qD1   | 99441586  | 29 (0)   |
| 86.  | MMU8qE2   | 124382305 | 96 (7)   |
| 87.  | MMU9qF1   | 107555844 | 69 (8)   |
| 88.  | MMU10qA3* | 20386921  | 108 (4)  |
| 89.  | MMU10qA4  | 23884170  | 79 (5)   |
| 90.  | MMU10qB4  | 52395376  | 64 (0)   |
| 91.  | MMU10qC1  | 77766053  | 80 (6)   |
| 92.  | MMU10qC2  | 94566861  | 107 (2)  |
| 93.  | MMU10qD1  | 102582412 | 77 (1)   |
| 94.  | MMU10qD1  | 109282510 | 37 (0)   |
| 95.  | MMU10qD3  | 128822293 | 31 (0)   |
| 96.  | MMU11qA5  | 39050575  | 46 (0)   |
| 97.  | MMU11qB1  | 51208664  | 259 (20) |
| 98.  | MMU11qC*  | 86742175  | 55 (6)   |
| 99.  | MMU11qE2  | 116247901 | 24 (0)   |
| 100. | MMU12qA1  | 5539939   | 41 (0)   |
| 101. | MMU12qB1  | 41720169  | 30 (0)   |
| 102. | MMU12qC1  | 62475644  | 37 (0)   |
| 103. | MMU12qC3  | 70620108  | 66 (0)   |
| 104. | MMU12qD1  | 79134013  | 60 (3)   |
| 105. | MMU12qE   | 100972302 | 87 (0)   |
| 106. | MMU13qA4  | 41999177  | 59 (0)   |
| 107. | MMU13qB3  | 59335002  | 86 (1)   |
| 108. | MMU13qC3  | 79889500  | 27 (0)   |
| 109. | MMU13qD2  | 108243674 | 48 (0)   |
| 110. | MMU13qD2  | 112610858 | 105 (6)  |
| 111. | MMU13qD2  | 112610858 | 95 (0)   |
| 112. | MMU14qA1  | 5674431   | 187 (13) |
| 113. | MMU14qE1  | 85374410  | 89 (0)   |
| 114. | MMU14qE2  | 90107006  | 27 (0)   |
| 115. | MMU15qA2  | 21617684  | 92 (7)   |
| 116. | MMU16qC1  | 62304223  | 85 (0)   |
| 117. | MMU16qC4  | 92764017  | 64 (1)   |
| 118. | MMU17qA1  | 7020493   | 73 (1)   |
| 119. | MMU17qC   | 48857482  | 46 (0)   |
| 120. | MMU17qE1  | 60430595  | 92 (2)   |
| 121. | MMU17qE1  | 63343905  | 26 (0)   |
| 122. | MMU17qE1  | 64566976  | 64 (0)   |
| 123. | MMU17qE4  | 85549301  | 52 (2)   |
| 124. | MMU18qE4  | 88190355  | 130 (14) |
| 125. | MMU19qD1  | 49354505  | 62 (3)   |
| 126. | MMU19qD1  | 50355142  | 78 (0)   |
| 127. | MMUXqE3   | 122471233 | 123 (3)  |
| 128. | MMUXqF1   | 134716722 | 150 (11) |

\* This ITS is listed in Table 4 as well because it contains a TERC-like fragment

**Table S2 - Rat ITS loci for which the orthologous mouse loci were not found or were grossly rearranged**

|     | Chromosomal localization | Starting nucleotide of ITS | ITS length (mismatches) |
|-----|--------------------------|----------------------------|-------------------------|
| 1.  | RNO1p13                  | 164644                     | 88 (3)                  |
| 2.  | RNO1q22                  | 106009847                  | 114 (2)                 |
| 3.  | RNO1q31                  | 131650533                  | 96 (3)                  |
| 4.  | RNO1q33                  | 163818941                  | 76 (4)                  |
| 5.  | RNO1q35                  | 175561089                  | 85 (1)                  |
| 6.  | RNO1q36                  | 183109132                  | 117 (8)                 |
| 7.  | RNO1q41                  | 200487042                  | 61 (1)                  |
| 8.  | RNO1q55                  | 267974943                  | 117 (2)                 |
| 9.  | RNO2q11                  | 1422670                    | 25 (0)                  |
| 10. | RNO2q11                  | 1683881                    | 77 (1)                  |
| 11. | RNO2q23                  | 95850058                   | 68 (1)                  |
| 12. | RNO2q26                  | 127631660                  | 251 (15)                |
| 13. | RNO2q26                  | 131484037                  | 46 (1)                  |
| 14. | RNO2q32                  | 162409549                  | 67 (1)                  |
| 15. | RNO2q41                  | 209487855                  | 87 (0)                  |
| 16. | RNO3q11                  | 18944065                   | 71 (0)                  |
| 17. | RNO3q41                  | 137628190                  | 66 (1)                  |
| 18. | RNO4q12                  | 16290544                   | 97 (2)                  |
| 19. | RNO4q22                  | 55452102                   | 141 (14)                |
| 20. | RNO4q24                  | 91412687                   | 76 (0)                  |
| 21. | RNO4q34                  | 113692255                  | 52 (0)                  |
| 22. | RNO4q42                  | 152782124                  | 62 (0)                  |
| 23. | RNO5q11                  | 7053449                    | 91 (1)                  |
| 24. | RNO6q21                  | 58147875                   | 92 (0)                  |
| 25. | RNO6q32                  | 124711399                  | 77 (1)                  |
| 26. | RNO6q33                  | 141234118                  | 88 (0)                  |
| 27. | RNO7q11                  | 293061                     | 39 (1)                  |
| 28. | RNO7q11                  | 2023033                    | 28 (0)                  |
| 29. | RNO7q13                  | 32465086                   | 26 (0)                  |
| 30. | RNO7q22                  | 55554984                   | 183 (10)                |
| 31. | RNO7q22                  | 68103256                   | 24 (0)                  |
| 32. | RNO7q34                  | 113136411                  | 160 (5)                 |
| 33. | RNO8q11                  | 1030296                    | 97 (4)                  |
| 34. | RNO8q24                  | 76974148                   | 51 (0)                  |
| 35. | RNO9q12                  | 9159293                    | 31 (0)                  |
| 36. | RNO11p11                 | 8555497                    | 68 (0)                  |
| 37. | RNO11p11                 | 12061065                   | 53 (0)                  |
| 38. | RNO11q21                 | 48951428                   | 60 (0)                  |
| 39. | RNO13p13                 | 5179160                    | 98 (4)                  |
| 40. | RNO13p13                 | 14234017                   | 30 (0)                  |
| 41. | RNO13p12                 | 20877960                   | 130 (13)                |
| 42. | RNO14p22                 | 174304                     | 132 (5)                 |
| 43. | RNO15p16                 | 6345211                    | 33 (0)                  |
| 44. | RNO15p14                 | 26976738                   | 273 (13)                |
| 45. | RNO15q11                 | 53583323                   | 119 (6)                 |
| 46. | RNO15q12                 | 65979922                   | 140 (6)                 |
| 47. | RNO15q21                 | 77130954                   | 435 (4)                 |
| 48. | RNO15q23                 | 99271717                   | 97 (2)                  |
| 49. | RNO16p12                 | 33549358                   | 51 (2)                  |
| 50. | RNO16q12                 | 51992807                   | 82 (1)                  |
| 51. | RNO16q12                 | 88971954                   | 31 (0)                  |
| 52. | RNO17p14                 | 1739929                    | 75 (2)                  |
| 53. | RNO17q12                 | 77356563                   | 74 (0)                  |
| 54. | RNO18q11                 | 39222133                   | 157 (11)                |
| 55. | RNO19p14                 | 640848                     | 98 (0)                  |
| 56. | RNO19q11                 | 34697675                   | 37 (2)                  |
| 57. | RNO20p12                 | 280344                     | 74 (0)                  |
| 58. | RNO20q12                 | 39742133                   | 78 (0)                  |
| 59. | RNO20q12                 | 41481409                   | 35 (0)                  |
| 60. | RNOXq21                  | 43855603                   | 93 (5)                  |
| 61. | RNOXq22                  | 65952063                   | 67 (1)                  |
| 62. | RNO1p12                  | 20452884                   | 47 (0)                  |
| 63. | RNO1p11                  | 34478715                   | 62 (1)                  |
| 64. | RNO1q11                  | 44296656                   | 62 (2)                  |
| 65. | RNO1q12                  | 53737274                   | 255 (15)                |
| 66. | RNO1q22                  | 97292217                   | 63 (0)                  |

|      |          |           |          |
|------|----------|-----------|----------|
| 67.  | RNO1q31  | 139142856 | 88 (3)   |
| 68.  | RNO1q43  | 208382180 | 30 (1)   |
| 69.  | RNO1q41  | 195142919 | 87 (2)   |
| 70.  | RNO1q43  | 215070728 | 37 (0)   |
| 71.  | RNO1q52  | 233937189 | 106 (6)  |
| 72.  | RNO1q53  | 242560631 | 128 (6)  |
| 73.  | RNO1q55  | 259556514 | 51 (3)   |
| 74.  | RNO2q24  | 113489822 | 61 (0)   |
| 75.  | RNO2q41  | 210756450 | 83 (1)   |
| 76.  | RNO2q42  | 225266594 | 140 (8)  |
| 77.  | RNO3q11  | 21004885  | 57 (1)   |
| 78.  | RNO3q42  | 64252224  | 26 (0)   |
| 79.  | RNO4q22  | 56934688  | 115 (7)  |
| 80.  | RNO4q34  | 118695044 | 56 (2)   |
| 81.  | RNO4q42  | 157332629 | 34 (0)   |
| 82.  | RNO4q44  | 185479314 | 168 (4)  |
| 83.  | RNO5q13  | 30866687  | 118 (5)  |
| 84.  | RNO5q22  | 63676922  | 26 (0)   |
| 85.  | RNO5q22  | 65323533  | 70 (0)   |
| 86.  | RNO6q14  | 25631222  | 54 (1)   |
| 87.  | RNO7q31  | 88176141  | 52 (1)   |
| 88.  | RNO7q35  | 135544846 | 47 (5)   |
| 89.  | RNO8q24  | 61126761  | 67 (1)   |
| 90.  | RNO9q11  | 1565632   | 69 (0)   |
| 91.  | RNO9q22  | 43258238  | 101 (4)  |
| 92.  | RNO11q21 | 64077853  | 31 (0)   |
| 93.  | RNO11q23 | 84836606  | 61 (0)   |
| 94.  | RNO12p11 | 12354519  | 27 (0)   |
| 95.  | RNO12q16 | 34993840  | 125 (6)  |
| 96.  | RNO13p13 | 11099120  | 24 (0)   |
| 97.  | RNO13q21 | 68421549  | 51 (2)   |
| 98.  | RNO13q23 | 82972333  | 57 (0)   |
| 99.  | RNO14q11 | 50824390  | 27 (0)   |
| 100. | RNO14q21 | 69190935  | 27 (0)   |
| 101. | RNO14q21 | 93892908  | 62 (1)   |
| 102. | RNO14q22 | 96532727  | 81 (0)   |
| 103. | RNO15p16 | 11428279  | 125 (4)  |
| 104. | RNO15q22 | 87943445  | 95 (0)   |
| 105. | RNO15q23 | 93088832  | 130 (6)  |
| 106. | RNO15q25 | 106924507 | 26 (0)   |
| 107. | RNO16p16 | 4935008   | 212 (11) |
| 108. | RNO16p13 | 27007233  | 75 (0)   |
| 109. | RNO16q11 | 43767568  | 95 (6)   |
| 110. | RNO16q11 | 51145059  | 212 (14) |
| 111. | RNO16q12 | 64930354  | 63 (0)   |
| 112. | RNO16q12 | 74494133  | 48 (0)   |
| 113. | RNO17p12 | 41560293  | 44 (0)   |
| 114. | RNO17q12 | 96417267  | 117 (3)  |
| 115. | RNO18p12 | 18051078  | 56 (1)   |
| 116. | RNO18q12 | 80539217  | 34 (0)   |
| 117. | RNO19p11 | 21760954  | 25 (0)   |
| 118. | RNO20p12 | 12658773  | 69 (0)   |
| 119. | RNO20p11 | 24159329  | 78 (0)   |
| 120. | RNOXq21  | 51133215  | 88 (2)   |
