# Supplementary material for: Contribution of telomerase RNA retrotranscription to DNA double-strand break repair during mammalian genome evolution
Source: PubMed Central journal article supplement (PMC2246262; doi:10.1186/gb-2007-8-12-r260), 2007-12-07
Supplement: gb-2007-8-12-r260-S3.pdf [file gb-2007-8-12-r260-S3.pdf]

Additional data file 3

Table S3 - ITS loci conserved in mouse and rat

|     | Mouse locus organization |                            |                         | Rat locus organization   |                            |                         |
|-----|--------------------------|----------------------------|-------------------------|--------------------------|----------------------------|-------------------------|
|     | Chromosomal localization | Starting nucleotide of ITS | ITS length (mismatches) | Chromosomal localization | Starting nucleotide of ITS | ITS length (mismatches) |
| 1.  | MMU1qC2                  | 62063616                   | 32 (3)                  | RNO9q31                  | 60540906                   | 51 (7)                  |
| 2.  | MMU1qC2                  | 64427125                   | 73 (3)                  | RNO9q32                  | 62951009                   | 22 (0)                  |
| 3.  | MMU1qC3                  | 74158115                   | 135 (19)                | RNO9q33                  | 73337466                   | 533 (58)                |
| 4.  | MMU1qE2                  | 119920380                  | 24 (0)                  | RNO_rand                 | 57467294                   | 28 (4)                  |
| 5.  | MMU1qE4                  | 131572015                  | 38 (1)                  | RNO13q13                 | 44660352                   | 199 (10)                |
| 6.  | MMU2qA1                  | 4433412                    | 59 (0)                  | RNO17q12                 | 84886191                   | 52 (3)                  |
| 7.  | MMU2qA3                  | 17561003                   | 25 (6)                  | RNO17q12                 | 91683881                   | 76 (0)                  |
| 8.  | MMU2qE1                  | 91798533                   | 192 (7)                 | RNO3q24                  | 76382638                   | 64 (3)                  |
| 9.  | MMU2qE3                  | 109539109                  | 17 (3)                  | RNO3q33                  | 95264034                   | 85 (2)                  |
| 10. | MMU2qE3                  | 109917404                  | 89 (0)                  | RNO3q33                  | 95671780                   | 95 (1)                  |
| 11. | MMU3qF1                  | 85044153                   | 65 (9)                  | RNO2q34                  | 177050753                  | 80 (1)                  |
| 12. | MMU4qE2                  | 151645396                  | 581 (35)                | RNO5q36                  | 170227213                  | 101 (3)                 |
| 13. | MMU5qA3                  | 24010932                   | 26 (1)                  | RNO4q11                  | 4978622                    | 26 (1)                  |
| 14. | MMU5qB3                  | 45192024                   | 72 (0)                  | RNO14q21                 | 69805055                   | 164 (18)                |
| 15. | MMU5qC3                  | 66308888                   | 25 (2)                  | RNO14p11                 | 43236526                   | 71 (2)                  |
| 16. | MMU5qF                   | 112310197                  | 57 (1)                  | RNO12q16                 | 44270562                   | 62 (0)                  |
| 17. | MMU5qF                   | 115589154                  | 53 (6)                  | RNO12q16                 | 41210302                   | 139 (15)                |
| 18. | MMU6qB3                  | 51195277                   | 63 (0)                  | RNO4q24                  | 79591374                   | 159 (8)                 |
| 19. | MMU6qG3                  | 147451997                  | 68 (3)                  | RNO4q44                  | 184345247                  | 46 (4)                  |
| 20. | MMU7qD3                  | 77467335                   | 39 (0)                  | RNO1q31                  | 139947387                  | 36 (3)                  |
| 21. | MMU7qF1                  | 108460541                  | 14 (0)                  | RNO1q34                  | 172785873                  | 94 (4)                  |
| 22. | MMU8qA2*                 | 21522395                   | 213 (32)                | RNO16q12                 | 73726146                   | 58 (8)                  |
| 23. | MMU8qA2                  | 23608910                   | 35 (2)                  | RNO16q12                 | 71592478                   | 38 (5)                  |
| 24. | MMU8qB1                  | 47783105                   | 59 (1)                  | RNO16q11                 | 46504498                   | 387 (23)                |
| 25. | MMU8qD1                  | 95017210                   | 15 (2)                  | RNO19p13                 | 9793116                    | 43 (1)                  |
| 26. | MMU8qE1                  | 113750259                  | 68 (1)                  | RNO19q12                 | 44516093                   | 180 (12)                |
| 27. | MMU9qA1                  | 9045604                    | 62 (6)                  | RNO8q11                  | 5902933                    | 101 (8)                 |
| 28. | MMU9qA4                  | 27106270                   | 114 (3)                 | RNO8q13                  | 26818560                   | 42 (4)                  |
| 29. | MMU9qB                   | 61842383                   | 59 (0)                  | RNO8q24                  | 65892486                   | 17 (1)                  |
| 30. | MMU9qE1                  | 82381409                   | 25 (5)                  | RNO8q31                  | 87181452                   | 147 (11)                |
| 31. | MMU9qE3                  | 85594962                   | 15 (2)                  | RNO8q31                  | 90457904                   | 76 (0)                  |
| 32. | MMU9qE3                  | 90189609                   | 79 (0)                  | RNO8q31                  | 95221777                   | 25 (1)                  |
| 33. | MMU11qA4                 | 32769712                   | 20 (2)                  | RNO10q12                 | 17751058                   | 26 (0)                  |
| 34. | MMU12qA1                 | 7171657                    | 77 (3)                  | RNO6q14                  | 31456143                   | 259 (30)                |
| 35. | MMU13qA1                 | 14818453                   | 95 (6)                  | RNO17q12                 | 57969885                   | 114 (3)                 |
| 36. | MMU13qA3                 | 30250737                   | 18 (0)                  | RNO17p12                 | 40169067                   | 109 (0)                 |
| 37. | MMU14qD1                 | 63964261                   | 139 (26)                | RNO15p11                 | 50038098                   | 136 (18)                |
| 38. | MMU14qD2                 | 68413206                   | 98 (1)                  | RNO15q11                 | 54871684                   | 23 (1)                  |
| 39. | MMU14qE4                 | 113850186                  | 74 (0)                  | RNO15q24                 | 104335692                  | 26 (1)                  |
| 40. | MMU15qA1                 | 6105783                    | 79 (3)                  | RNO2q16                  | 55550830                   | 83 (1)                  |
| 41. | MMU15qD1                 | 63643128                   | 66 (2)                  | RNO7q33                  | 100934611                  | 42 (1)                  |
| 42. | MMU16qA1                 | 5378919                    | 88 (1)                  | RNO10q12                 | 9970917                    | 96 (11)                 |
| 43. | MMU16qA1                 | 10868801                   | 22 (0)                  | RNO10q11                 | 3293349                    | 164 (7)                 |
| 44. | MMU16qA1                 | 11449519                   | 94 (14)                 | RNO10q11                 | 2632768                    | 79 (5)                  |
| 45. | MMU16qA2                 | 15995448                   | 32 (0)                  | RNO11q23                 | 85816996                   | 19 (2)                  |
| 46. | MMU16qB3                 | 37593433                   | 136 (14)                | RNO11q21                 | 63826479                   | 49 (3)                  |
| 47. | MMU16qB4                 | 44064610                   | 14 (0)                  | RNO11q21                 | 57225814                   | 31 (1)                  |
| 48. | MMU18qE1                 | 62328309                   | 25 (4)                  | RNO18q12                 | 58166416                   | 55 (0)                  |
| 49. | MMU18qE2                 | 73371382                   | 42 (3)                  | RNO18q12                 | 69971922                   | 166 (16)                |
| 50. | MMU18qE3                 | 78321060                   | 166 (12)                | RNO18q12                 | 75198749                   | 88 (8)                  |
| 51. | MMU18qE4                 | 85545016                   | 18 (2)                  | RNO18q12                 | 82103975                   | 46 (0)                  |
| 52. | MMU19qB                  | 20096670                   | 34 (8)                  | RNO1q51                  | 224142209                  | 24 (0)                  |
| 53. | MMU19qC1                 | 26000868                   | 21 (1)                  | RNO1q51                  | 230330344                  | 33 (1)                  |
| 54. | MMU19qC1                 | 31269912                   | 144 (7)                 | RNO1q52                  | 236105371                  | 57 (6)                  |
| 55. | MMU19qC2                 | 36046186                   | 76 (2)                  | RNO1q53                  | 241146022                  | 46 (4)                  |
| 56. | MMUXqA3                  | 33510293                   | 46 (3)                  | RNOXq11                  | 6336105                    | 137 (6)                 |
| 57. | MMUXqC3*                 | 94681997                   | 25 (1)                  | RNO8q31                  | 88164265                   | 43 (4)                  |
| 58. | MMUXqF2                  | 140480893                  | 30 (4)                  | RNOXq14                  | 31212745                   | 25 (0)                  |

\* Listed also in Table 4
