# Supplementary material for: Contribution of telomerase RNA retrotranscription to DNA double-strand break repair during mammalian genome evolution
Source: PubMed Central journal article supplement (PMC2246262; doi:10.1186/gb-2007-8-12-r260), 2007-12-07
Supplement: gb-2007-8-12-r260-S4.pdf [file gb-2007-8-12-r260-S4.pdf]

## Additional data file 4

Table S4 - Mouse-specific ITS loci

|     | Mouse locus organization |                            |                                           | Rat empty locus organization |                                     |                                          | Nucleotides in register with the inserted telomeric array | Insertion mechanism |
|-----|--------------------------|----------------------------|-------------------------------------------|------------------------------|-------------------------------------|------------------------------------------|-----------------------------------------------------------|---------------------|
|     | Chromosomal localization | Starting nucleotide of ITS | Length of telomeric sequence (mismatches) | Chromosomal localization     | Starting nucleotide of "empty site" | Length of flanking sequence modification |                                                           |                     |
| 1.  | MMU1qC3                  | 71374308                   | 74 (0)                                    | RNO9q33                      | 70315182                            | 0                                        | 1                                                         | No modification     |
| 2.  | MMU2qE1                  | 91872864                   | 69 (0)                                    | RNO3q24                      | 76463664                            | 0                                        | 1                                                         | "                   |
| 3.  | MMU3qC3                  | 127866865                  | 101 (4)                                   | RNO2q42                      | 226274249                           | 0                                        | 0                                                         | "                   |
| 4.  | MMU3qF2                  | 99911261                   | 62 (0)                                    | RNO2q34                      | 195440626                           | 0                                        | 2                                                         | "                   |
| 5.  | MMU5qG2                  | 130133907                  | 71 (3)                                    | RNO12q12                     | 26586232                            | 0                                        | 1                                                         | "                   |
| 6.  | MMU9qE3                  | 83888973                   | 55 (1)                                    | RNO8q31                      | 88638371                            | 0                                        | 0                                                         | "                   |
| 7.  | MMU9qF3                  | 115334624                  | 138 (3)                                   | RNO8q11                      | 119809272                           | 0                                        | 6                                                         | "                   |
| 8.  | MMU10qA4                 | 30006900                   | 81 (0)                                    | RNO1p11                      | 28586014                            | 0                                        | 0                                                         | "                   |
| 9.  | MMU12qA1                 | 16114173                   | 100 (1)                                   | RNO6q15                      | 40425216                            | 0                                        | 4                                                         | "                   |
| 10. | MMUq12A3                 | 38124518                   | 80 (0)                                    | RNO6q21                      | 60804523                            | 0                                        | 3                                                         | "                   |
| 11. | MMU14qD3                 | 80609799                   | 150 (0)                                   | RNO15q12                     | 68344228                            | 0                                        | 2                                                         | "                   |
| 12. | MMU15qF3                 | 103164652                  | 47 (2)                                    | RNO7q36                      | 141947229                           | 0                                        | 3                                                         | "                   |
| 13. | MMU16qB2                 | 29638411                   | 129 (5)                                   | RNO11q22                     | 71844349                            | 0                                        | 4                                                         | "                   |
| 14. | MMU16qB3                 | 33557115                   | 65 (0)                                    | RNO11q22                     | 67908608                            | 0                                        | 5                                                         | "                   |
| 15. | MMU18qC                  | 48232284                   | 114 (1)                                   | RNO18q11                     | 42680339                            | 0                                        | 1                                                         | "                   |
| 16. | MMU2qC1                  | 66044880                   | 274 (17)                                  | RNO3q21                      | 48046795                            | 5                                        | 5                                                         | Deletion            |
| 17. | MMU2qH3                  | 165898759                  | 174 (16)                                  | RNO3_Rand                    | 1442317                             | 8                                        | 5                                                         | "                   |
| 18. | MMU2qH4                  | 180305852                  | 27 (0)                                    | RNOq43                       | 169585253                           | 14                                       | 0                                                         | "                   |
| 19. | MMU3qD                   | 59598683                   | 60 (0)                                    | RNO2q31                      | 149152710                           | 55                                       | 0                                                         | "                   |
| 20. | MMU3qF2                  | 102874350                  | 57 (1)                                    | RNO2q34                      | 198648736                           | 16                                       | 1                                                         | "                   |
| 21. | MMU3qH4                  | 158927773                  | 28 (0)                                    | RNO2q45                      | 258112731                           | 5                                        | 1                                                         | "                   |
| 22. | MMU4qC6                  | 98356530                   | 76 (1)                                    | RNO5q33                      | 120026192                           | 4                                        | 1                                                         | "                   |
| 23. | MMU5qE3                  | 92625465                   | 77 (0)                                    | RNO14p22                     | 16323799                            | 17                                       | 3                                                         | "                   |
| 24. | MMU7qA1                  | 13485079                   | 30 (0)                                    | RNO1q21                      | 76873665                            | 5                                        | 1                                                         | "                   |
| 25. | MMU7qF4                  | 132979741                  | 78 (2)                                    | RNO1q41                      | 198553718                           | 5                                        | 2                                                         | "                   |
| 26. | MMU8qA1                  | 17219445                   | 49 (0)                                    | RNO16q12                     | 77268741                            | 6                                        | 3                                                         | "                   |
| 27. | MMU9qE3                  | 95334838                   | 132 (5)                                   | RNO8q31                      | 100534657                           | 10                                       | 4                                                         | "                   |
| 28. | MMU10qA3                 | 18627223                   | 49 (3)                                    | RNO1p12                      | 13804580                            | 84                                       | 0                                                         | "                   |
| 29. | MMU10qC2                 | 94845948                   | 75 (0)                                    | RNO7q13                      | 32086310                            | 17                                       | 8                                                         | "                   |
| 30. | MMU10qD2                 | 123367729                  | 48 (0)                                    | RNO7q22                      | 63491942                            | 16                                       | 0                                                         | "                   |
| 31. | MMU11qA5                 | 40477183                   | 43 (0)                                    | RNO10q12                     | 25767746                            | 5                                        | 1                                                         | "                   |
| 32. | MMU11qB3                 | 64408301                   | 104 (7)                                   | RNO10q24                     | 51014457                            | 7                                        | 2                                                         | "                   |
| 33. | MMU13qC3                 | 90125363                   | 88 (5)                                    | RNO2p12                      | 24144489                            | 13                                       | 3                                                         | "                   |
| 34. | MMU14qA1                 | 10994375                   | 67 (1)                                    | RNO16p16                     | 14152855                            | 4                                        | 0                                                         | "                   |
| 35. | MMU14qC2                 | 53194069                   | 109 (3)                                   | RNO15p12                     | 37725128                            | 8                                        | 2                                                         | "                   |
| 36. | MMU15qE2                 | 85590832                   | 61 (0)                                    | RNO7q34                      | 123572670                           | 5                                        | 3                                                         | "                   |
| 37. | MMU15qE3                 | 88020385                   | 121 (2)                                   | RNO7q34                      | 126305612                           | 32                                       | 2                                                         | "                   |
| 38. | MMU18qB3                 | 43134545                   | 97 (3)                                    | RNO18p11                     | 36195781                            | 6                                        | 0                                                         | "                   |
| 39. | MMU19qC1                 | 31632160                   | 54 (0)                                    | RNO1q52                      | 236482320                           | 45                                       | 2                                                         | "                   |
| 40. | MMU19qD2                 | 58082329                   | 49 (0)                                    | RNO1q55                      | 265111070                           | 9                                        | 1                                                         | "                   |
| 41. | MMUXqA1                  | 12978918                   | 111 (8)                                   | RNOXq12                      | 20029300                            | 7                                        | 0                                                         | "                   |
| 42. | MMUXqE3                  | 127695000                  | 290 (24)                                  | RNOXq34                      | 121683365                           | 34                                       | 2                                                         | "                   |
| 43. | MMU1qH6                  | 192966577                  | 112 (0)                                   | RNO13q27                     | 109265521                           | 2                                        | NI                                                        | Random Seq Add      |
| 44. | MMU1qH6                  | 192192893                  | 91 (0)                                    | RNO13q27                     | 108546028                           | 5                                        | NI                                                        | "                   |
| 45. | MMU2qH4                  | 178503999                  | 54 (0)                                    | RNO3q43                      | 167805605                           | 39                                       | 2                                                         | "                   |
| 46. | MMU3qG1                  | 120587839                  | 63 (4)                                    | RNO2q41                      | 218407148                           | 6                                        | NI                                                        | "                   |
| 47. | MMU8qE2                  | 123248677                  | 122 (7)                                   | RNO19q12                     | 54165535                            | 141                                      | NI                                                        | "                   |
| 48. | MMU9qF3                  | 113313368                  | 63 (2)                                    | RNO8q32                      | 117921021                           | 1                                        | 0                                                         | "                   |
| 49. | MMU18qA2                 | 23040469                   | 62 (4)                                    | RNO18p12                     | 14490884                            | 2                                        | NI                                                        | "                   |
| 50. | MMU18qE4                 | 89175564                   | 51 (0)                                    | RNO18q13                     | 85967271                            | 3                                        | 2                                                         | "                   |
| 51. | MMU3qA3                  | 21038765                   | 89 (0)                                    | RNO2q24                      | 107072450                           | 11                                       | 3                                                         | Duplication         |
| 52. | MMU12qE                  | 98339162                   | 62 (0)                                    | RNO6q32                      | 127158889                           | 18                                       | 3                                                         | "                   |
| 53. | MMU11qE2                 | 120349304                  | 53 (0)                                    | RNO10q32                     | 109932417                           | 46/91                                    | NI                                                        | Random Seq Add/Del  |
| 54. | MMU1qC3*                 | 69326366                   | 139 (16)                                  | RNO9q32                      | 68032617                            | 50                                       | NI                                                        | TERC Add            |
| 55. | MMU9qA5*                 | 47975239                   | 66 (0)                                    | RNO8q23                      | 51245798                            | 65                                       | NI                                                        | "                   |
| 56. | MMU1qC1*                 | 47024585                   | 57 (0)                                    | RNO9q22                      | 52312295                            | 31/126                                   | NI                                                        | TERC Add/Del        |

|     |           |           |        |          |           |       |    |   |
|-----|-----------|-----------|--------|----------|-----------|-------|----|---|
| 57. | MMU4qD2*  | 119006631 | 53 (3) | RNO5q36  | 140562692 | 42/11 | NI | “ |
| 58. | MMU10qB4* | 58505217  | 27 (1) | RNO20q11 | 37230663  | 118/7 | NI | “ |

\* Listed also in Table 4

NI, Not informative

Seq, sequence

Add, addition

Del, deletion

**Table S5 - Rat-specific ITS loci**

|     | Rat locus organization   |                            |                                           | Mouse empty locus organization |                                     |                                          | Nucleotides in register with the inserted telomeric array | Insertion mechanism |
|-----|--------------------------|----------------------------|-------------------------------------------|--------------------------------|-------------------------------------|------------------------------------------|-----------------------------------------------------------|---------------------|
|     | Chromosomal localization | Starting nucleotide of ITS | Length of telomeric sequence (mismatches) | Chromosomal localization       | Starting nucleotide of "empty site" | Length of flanking sequence modification |                                                           |                     |
| 1.  | RNO1q33                  | 170404611                  | 60 (0)                                    | MMU7qE3                        | 106338358                           | 0                                        | 1                                                         | No modification     |
| 2.  | RNO2q44                  | 244500676                  | 45 (4)                                    | MMU3qH2                        | 145265356                           | 0                                        | 0                                                         | "                   |
| 3.  | RNO3q36                  | 115152268                  | 58 (0)                                    | MMU2qF1                        | 127237595                           | 0                                        | 6                                                         | "                   |
| 4.  | RNO3q43                  | 170542669                  | 32 (0)                                    | MMU2qH4                        | 181218602                           | 0                                        | 2                                                         | "                   |
| 5.  | RNO4q33                  | 106635857                  | 70 (0)                                    | MMU6qC1                        | 73387975                            | 0                                        | 4                                                         | "                   |
| 6.  | RNO6q24                  | 93355784                   | 96 (2)                                    | MMU12qC2                       | 68091145                            | 0                                        | 5                                                         | "                   |
| 7.  | RNO7q34                  | 109642996                  | 61 (0)                                    | MMU15qD3                       | 71925048                            | 0                                        | 1                                                         | "                   |
| 8.  | RNO7q34                  | 116325182                  | 76 (2)                                    | MMU15qE1                       | 78421075                            | 0                                        | 2                                                         | "                   |
| 9.  | RNO10q26                 | 74713422                   | 63 (0)                                    | MMU11qC                        | 86184449                            | 0                                        | 3                                                         | "                   |
| 10. | RNO13q22                 | 77344646                   | 53 (0)                                    | MMU1qH2                        | 161559860                           | 0                                        | 1                                                         | "                   |
| 11. | RNO14p11                 | 33782205                   | 30 (0)                                    | MMU5qC3                        | 75910183                            | 0                                        | 0                                                         | "                   |
| 12. | RNO14q21                 | 78916865                   | 106 (3)                                   | MMU5qB3                        | 35932974                            | 0                                        | 3                                                         | "                   |
| 13. | RNO17p12                 | 37360246                   | 73 (0)                                    | MMU13qA3                       | 33425385                            | 0                                        | 2                                                         | "                   |
| 14. | RNO17q12                 | 55663586                   | 70 (1)                                    | MMU13qA2                       | 17018301                            | 0                                        | 1                                                         | "                   |
| 15. | RNO18q11                 | 47451682                   | 118 (2)                                   | MMU18qD1                       | 52292258                            | 0                                        | 0                                                         | "                   |
| 16. | RNOXq14                  | 38375105                   | 57 (0)                                    | MMUXqF3                        | 146739252                           | 0                                        | 0                                                         | "                   |
| 17. | RNO1q32                  | 158508662                  | 94 (0)                                    | MMU7qE1                        | 95094008                            | 12                                       | 0                                                         | Deletion            |
| 18. | RNO1q41                  | 191523325                  | 75 (2)                                    | MMU7qF3                        | 126149266                           | 2                                        | 1                                                         | "                   |
| 19. | RNO1q55                  | 264659404                  | 98 (1)                                    | MMU19qD2                       | 57679643                            | 4                                        | 0                                                         | "                   |
| 20. | RNO3q35                  | 101101050                  | 28 (0)                                    | MMU2qE4                        | 114746079                           | 8                                        | 1                                                         | "                   |
| 21. | RNO4q44                  | 176770103                  | 62 (0)                                    | MMU6qG2                        | 140196015                           | 25                                       | 1                                                         | "                   |
| 22. | RNO5q31                  | 102846995                  | 57 (1)                                    | MMU4qC3                        | 82992642                            | 22                                       | 2                                                         | "                   |
| 23. | RNO5q36                  | 140423491                  | 110 (3)                                   | MMU4qD2                        | 118860955                           | 68                                       | 4                                                         | "                   |
| 24. | RNO5q36                  | 170737787                  | 66 (0)                                    | MMU4qE2                        | 152431963                           | 5                                        | 3                                                         | "                   |
| 25. | RNO6q31                  | 115393976                  | 62 (1)                                    | MMU12qD3                       | 87181783                            | 9                                        | 0                                                         | "                   |
| 26. | RNO7q36                  | 142292316                  | 71 (0)                                    | MMU15qF3                       | 103364972                           | 2                                        | 3                                                         | "                   |
| 27. | RNO8q32                  | 123589071                  | 118 (6)                                   | MMU9qF3                        | 118646308                           | 14                                       | 2                                                         | "                   |
| 28. | RNO9q31                  | 53165600                   | 52 (0)                                    | MMU1qC1                        | 54667318                            | 2                                        | 3                                                         | "                   |
| 29. | RNO10q22                 | 37198112                   | 135 (5)                                   | MMU11qB1                       | 51430914                            | 44                                       | 1                                                         | "                   |
| 30. | RNO10q24                 | 52336121                   | 51 (0)                                    | MMU11qB3                       | 65791231                            | 10                                       | 4                                                         | "                   |
| 31. | RNO11q23                 | 83310408                   | 60 (0)                                    | MMU16qA3                       | 18724482                            | 6                                        | 3                                                         | "                   |
| 32. | RNO12q11                 | 15821984                   | 40 (0)                                    | MMU5qG2                        | 138355030                           | 86                                       | 3                                                         | "                   |
| 33. | RNO14p22                 | 2474415                    | 31 (0)                                    | MMU5qF                         | 106897508                           | 17                                       | 4                                                         | "                   |
| 34. | RNO14q22                 | 106891412                  | 34 (0)                                    | MMU11qA3                       | 25698816                            | 10                                       | 3                                                         | "                   |
| 35. | RNO15p16                 | 2025994                    | 57 (0)                                    | MMU14qA3                       | 20659475                            | 1                                        | 2                                                         | "                   |
| 36. | RNO15p16                 | 13792982                   | 72 (0)                                    | MMU14qA1                       | 11352844                            | 16                                       | 3                                                         | "                   |
| 37. | RNO15p11                 | 51765075                   | 79 (3)                                    | MMU14qD1                       | 65633532                            | 3                                        | 1                                                         | "                   |
| 38. | RNO15q25                 | 109409344                  | 96 (0)                                    | MMU14qE5                       | 118836002                           | 10                                       | 5                                                         | "                   |
| 39. | RNO16p16                 | 2456167                    | 78 (0)                                    | MMU14qA3                       | 25329537                            | 19                                       | 4                                                         | "                   |
| 40. | RNO16p15                 | 11869377                   | 106 (4)                                   | MMU14qB                        | 34116313                            | 11                                       | 0                                                         | "                   |
| 41. | RNO16p12                 | 31850136                   | 48 (1)                                    | MMU8qB3                        | 60660440                            | 42                                       | 0                                                         | "                   |
| 42. | RNO16q12                 | 55014499                   | 63 (0)                                    | MMU8qA4                        | 39547909                            | 49                                       | 1                                                         | "                   |
| 43. | RNO16q12                 | 65187785                   | 62 (0)                                    | MMU8qA2                        | 29662906                            | 2                                        | 3                                                         | "                   |
| 44. | RNO16q12                 | 89633150                   | 25 (0)                                    | MMU8qA1                        | 4775109                             | 6                                        | 2                                                         | "                   |
| 45. | RNO17p14                 | 3885471                    | 87 (0)                                    | MMU13qB3                       | 65599346                            | 17                                       | 1                                                         | "                   |
| 46. | RNO18p12                 | 25216364                   | 36 (1)                                    | MMU18qB1                       | 32959779                            | 7                                        | 1                                                         | "                   |
| 47. | RNO19p11                 | 16792421                   | 35 (0)                                    | MMU8qC4                        | 90669596                            | 2                                        | 0                                                         | "                   |
| 48. | RNO19q11                 | 32022918                   | 88 (0)                                    | MMU8qC1                        | 76960105                            | 6                                        | 5                                                         | "                   |
| 49. | RNO19q12                 | 55864771                   | 30 (0)                                    | MMU8qE2                        | 124937599                           | 11                                       | 1                                                         | "                   |
| 50. | RNO20p11                 | 26445860                   | 81 (0)                                    | MMU10qB5                       | 63952561                            | 1107                                     | 2                                                         | "                   |
| 51. | RNO20q11                 | 36173787                   | 88 (3)                                    | MMU10qB4                       | 57348931                            | 2                                        | 2                                                         | "                   |
| 52. | RNOXq12                  | 15324067                   | 101 (3)                                   | MMUXqA1                        | 17126359                            | 7                                        | 0                                                         | "                   |
| 53. | RNOXq13                  | 24504883                   | 59 (0)                                    | MMUXqA1                        | 8732733                             | 10                                       | 4                                                         | "                   |
| 54. | RNOXq37                  | 159499984                  | 63 (0)                                    | MMUXqA7                        | 68187963                            | 5                                        | 4                                                         | "                   |
| 55. | RNO5q36                  | 163728884                  | 24 (0)                                    | MMU4qE1                        | 144184636                           | 8                                        | NI                                                        | Random Seq Add      |
| 56. | RNO6q23                  | 76591610                   | 93 (7)                                    | MMU12qC1                       | 52913469                            | 1                                        | NI                                                        | "                   |
| 57. | RNO7q33                  | 100554100                  | 147 (6)                                   | MMU15qD1                       | 63366082                            | 29                                       | NI                                                        | "                   |

|     |          |           |          |          |           |       |    |                       |
|-----|----------|-----------|----------|----------|-----------|-------|----|-----------------------|
| 58. | RNO8q31  | 97024675  | 43 (0)   | MMU9qE3  | 91919459  | 24    | 1  | “                     |
| 59. | RNO9q11  | 1630245   | 77 (0)   | MMU17qC  | 50937699  | 8     | NI | “                     |
| 60. | RNO11q11 | 21546182  | 32 (0)   | MMU16qC3 | 81302928  | 15    | 0  | “                     |
| 61. | RNO14q11 | 64540088  | 61 (1)   | MMU5qC1  | 50101946  | 6     | 1  | “                     |
| 62. | RNO14q11 | 66506534  | 89 (0)   | MMU5qB3  | 48072607  | 226   | NI | “                     |
| 63. | RNO14q21 | 89089267  | 71 (3)   | MMU11qA1 | 8397275   | 3     | NI | “                     |
| 64. | RNO16p14 | 23309378  | 29 (0)   | MMU8qB3  | 67168858  | 32    | 0  | “                     |
| 65. | RNOXq31  | 92082288  | 218 (4)  | MMUXqD   | 98607768  | 50    | NI | “                     |
| 66. | RNOXq36  | 146334120 | 110 (3)  | MMUXqA6  | 55332956  | 34    | 0  | “                     |
| 67. | RNO1q32  | 159960687 | 116 (12) | MMU7qE2  | 96491722  | 14    | 0  | Duplication           |
| 68. | RNO2q34  | 181871056 | 69 (0)   | MMU3qF1  | 89474328  | 5     | 1  | “                     |
| 69. | RNO9q33  | 70280330  | 98 (4)   | MMU1qC3  | 71337574  | 187   | 2  | “                     |
| 70. | RNOXq21  | 45438697  | 127 (5)  | MMUXqF5  | 163069120 | 12    | 0  | “                     |
| 71. | RNO7q21  | 44474538  | 181 (13) | MMU10qD1 | 105687267 | 19/4  | NI | Random Seq<br>Add/Del |
| 72. | RNO18p13 | 3939241   | 87 (1)   | MMU18qA1 | 12604587  | 39/60 | NI | “                     |

NI, Not informative

Seq, sequence

Add, addition

Del, deletion
