# Supplementary material for: Contribution of telomerase RNA retrotranscription to DNA double-strand break repair during mammalian genome evolution
Source: PubMed Central journal article supplement (PMC2246262; doi:10.1186/gb-2007-8-12-r260), 2007-12-07
Supplement: gb-2007-8-12-r260-S5.pdf [file gb-2007-8-12-r260-S5.pdf]

Additional data file 5

Table S6 - ITS loci conserved in human and chimpanzee

|     | Human locus organization |                            |                         | Chimpanzee locus organization |                            |                         |
|-----|--------------------------|----------------------------|-------------------------|-------------------------------|----------------------------|-------------------------|
|     | Chromosomal localization | Starting nucleotide of ITS | ITS length (mismatches) | Chromosomal localization      | Starting nucleotide of ITS | ITS length (mismatches) |
| 1.  | HSA1p36                  | 11209776                   | 64 (3)                  | PTR1                          | 11646639                   | 96 (8)                  |
| 2.  | HSA1p36                  | 18013967                   | 34 (0)                  | PTR1                          | 18533223                   | 22 (0)                  |
| 3.  | HSA1p34                  | 41160952                   | 44 (2)                  | PTR1                          | 42378933                   | 38 (2)*                 |
| 4.  | HSA1p13                  | 78017054                   | 36 (0)                  | PTR1                          | 76901942                   | 36 (0)                  |
| 5.  | HSA2p12                  | 75274210                   | 42 (4)                  | PTR12                         | 77616525                   | 42 (4)                  |
| 6.  | HSA2q14                  | 123012039                  | 38 (3)                  | PTR13                         | 8662344                    | 38 (3)                  |
| 7.  | HSA2q31                  | 182343128                  | 69 (1)                  | PTR13                         | 71716824                   | 57 (1)*                 |
| 8.  | HSA2q36                  | 223130670                  | 50 (4)                  | PTR13                         | 113326474                  | 38 (4)                  |
| 9.  | HSA2q36                  | 230182006                  | 27 (2)                  | PTR13                         | 120433530                  | 27 (2)                  |
| 10. | HSA2q37                  | 233522426                  | 25 (1)                  | PTR13                         | 123736397                  | 37 (2)*                 |
| 11. | HSA2q37                  | 241482028                  | 35 (0)                  | PTR13                         | 35180448                   | 88 (2)*                 |
| 12. | HSA3p14                  | 59364839                   | 25 (0)                  | PTR2                          | 61115780                   | 25 (0)                  |
| 13. | HSA4p16                  | 6490170                    | 39 (2)                  | PTR3                          | 6607468                    | 39 (2)                  |
| 14. | HSA4p16                  | 8541680                    | 45 (3)                  | PTR3                          | 8544082                    | 39 (3)                  |
| 15. | HSA4p12                  | 47122044                   | 27 (1)                  | PTR3                          | 99870955                   | 27 (0)                  |
| 16. | HSA5p15                  | 16400930                   | 41 (2)                  | PTR4                          | 16829183                   | 41 (0)                  |
| 17. | HSA5p13                  | 40774567                   | 42 (3)                  | PTR4                          | 75782701                   | 42 (5)                  |
| 18. | HSA5q14                  | 82896052                   | 41 (2)                  | PTR4                          | 32318230                   | 23 (0)*                 |
| 19. | HSA6p24                  | 1060028                    | 39 (1)                  | PTR5                          | 1068621                    | 39 (1)*                 |
| 20. | HSA6p21                  | 38959659                   | 78 (4)                  | PTR5                          | 39570154                   | 60 (3)                  |
| 21. | HSA6q22                  | 135856130                  | 29 (1)                  | PTR5                          | 138701406                  | 29 (1)                  |
| 22. | HSA7p22                  | 972655                     | 33 (1)                  | PTR6                          | 1060973                    | 27 (2)                  |
| 23. | HSA7q36                  | 151986856                  | 53 (0)                  | PTR6                          | 17600852                   | 41 (0)*                 |
| 24. | HSA7q36                  | 154981811                  | 50 (3)                  | PTR6                          | 157876908                  | 62 (3)*                 |
| 25. | HSA7q36                  | 155395578                  | 28 (0)                  | PTR6                          | 158284654                  | 28 (0)                  |
| 26. | HSA8p12                  | 35523062                   | 39 (1)                  | PTR7                          | 36796288                   | 39 (1)*                 |
| 27. | HSA8p12                  | 37151482                   | 28 (1)                  | PTR7                          | 38433956                   | 28 (2)                  |
| 28. | HSA8q21                  | 76951504                   | 26 (1)                  | PTR7                          | 79138810                   | 26 (1)                  |
| 29. | HSA9p24                  | 2814045                    | 37 (0)                  | PTR11                         | 2778776                    | 25 (0)*                 |
| 30. | HSA9q21                  | 67337343                   | 71 (3)                  | PTR11                         | 52886831                   | 47 (2)                  |
| 31. | HSA9q34                  | 128303776                  | 100 (11)                | PTR11                         | 114929189                  | 94 (9)                  |
| 32. | HSA9q34                  | 132545184                  | 33 (1)                  | PTR11                         | 119195874                  | 33 (2)                  |
| 33. | HSA9q34                  | 136228252                  | 25 (2)                  | PTR11                         | 122972062                  | 37 (3)                  |
| 34. | HSA10p15                 | 3940375                    | 190 (28)                | PTR8                          | 4039317                    | 309 (47)                |
| 35. | HSA10p15                 | 4065429                    | 125 (18)                | PTR8                          | 4163428                    | 142 (15)                |
| 36. | HSA10p14                 | 8514520                    | 159 (13)                | PTR8                          | 8653542                    | 108 (12)                |
| 37. | HSA10p11                 | 46982375                   | 33 (1)                  | PTR8                          | 30811377                   | 33 (2)                  |
| 38. | HSA10q22                 | 79979595                   | 52 (7)                  | PTR8                          | 81693960                   | 53 (6)                  |
| 39. | HSA11p15                 | 1442570                    | 24 (2)                  | PTR9                          | 1570832                    | 24 (0)                  |
| 40. | HSA11p15                 | 2109783                    | 25 (0)                  | PTR9                          | 2298761                    | 25 (0)                  |
| 41. | HSA11p15                 | 10651009                   | 27 (0)                  | PTR9                          | 10879728                   | 19 (1)                  |
| 42. | HSA11p14                 | 25512080                   | 24 (0)                  | PTR9                          | 25818465                   | 24 (0)                  |
| 43. | HSA11q24                 | 123941136                  | 37 (2)                  | PTR9                          | 125987562                  | 37 (2)                  |
| 44. | HSA12p13                 | 87553                      | 35 (0)                  | PTR10                         | 105275                     | 29 (0)*                 |
| 45. | HSA12p11                 | 22285277                   | 35 (1)                  | PTR10                         | 22919421                   | 35 (1)*                 |
| 46. | HSA12q24                 | 125403098                  | 74 (7)                  | PTR10                         | 128685625                  | 74 (7)                  |
| 47. | HSA13q31                 | 80079215                   | 25 (1)                  | PTR14                         | 63870240                   | 27 (1)                  |
| 48. | HSA13q31                 | 92642532                   | 21 (0)                  | PTR14                         | 76770966                   | 27 (0)                  |
| 49. | HSA13q34                 | 110601947                  | 164 (26)                | PTR14                         | 95321714                   | 158 (27)                |
| 50. | HSA14q32                 | 97833450                   | 27 (2)                  | PTR15                         | 99410725                   | 33 (2)                  |
| 51. | HSA15q11                 | 18650515                   | 19 (0)                  | PTR16                         | 28031674                   | 24 (0)                  |
| 52. | HSA15q22                 | 69007769                   | 28 (2)                  | PTR16                         | 69709477                   | 28 (2)*                 |
| 53. | HSA15q25                 | 78471632                   | 31 (0)                  | PTR16                         | 79254569                   | 25 (0)                  |
| 54. | HSA16p13                 | 65241                      | 16 (0)                  | PTR18                         | 68110                      | 34 (0)                  |
| 55. | HSA16p13                 | 10314218                   | 31 (1)                  | PTR18                         | 10388919                   | 37 (2)                  |
| 56. | HSA16p12                 | 25738028                   | 55 (1)                  | PTR18                         | 26358917                   | 61 (1)                  |
| 57. | HSA16q22                 | 65053274                   | 49 (5)                  | PTR18                         | 58050751                   | 47 (4)                  |

|     |          |           |        |       |           |         |
|-----|----------|-----------|--------|-------|-----------|---------|
| 58. | HSA16q23 | 75930570  | 55 (6) | PTR18 | 69173216  | 50 (5)  |
| 59. | HSA16q24 | 88690816  | 37 (1) | PTR18 | 82476983  | 53 (2)  |
| 60. | HSA17p12 | 12576423  | 25 (2) | PTR19 | 26052515  | 25 (2)  |
| 61. | HSA17q25 | 78735795  | 21 (0) | PTR19 | 79337810  | 27 (0)  |
| 62. | HSA18q21 | 59791805  | 25 (1) | PTR17 | 56645827  | 25 (1)  |
| 63. | HSA19q13 | 21981095  | 38 (4) | PTR20 | 22928526  | 38 (5)* |
| 64. | HSA20p12 | 10167184  | 34 (1) | PTR21 | 9984464   | 34 (2)* |
| 65. | HSA21q21 | 22056873  | 42 (4) | PTR22 | 22224323  | 42 (4)  |
| 66. | HSA21q22 | 35005625  | 84 (6) | PTR22 | 35002687  | 66 (5)  |
| 67. | HSA21q22 | 38128537  | 35 (0) | PTR22 | 38168382  | 51 (0)  |
| 68. | HSA21q22 | 44708085  | 75 (7) | PTR22 | 44847640  | 75 (7)  |
| 69. | HSA22q13 | 43298817  | 52 (2) | PTR23 | 43656317  | 32 (1)  |
| 70. | HSA22q13 | 41492788  | 31 (0) | PTR23 | 41845876  | 31 (0)  |
| 71. | HSAXp22  | 2888475   | 57 (6) | PTRX  | 3051845   | 57 (6)  |
| 72. | HSAXp22  | 5490581   | 34 (2) | PTRX  | 5855638   | 34 (2)  |
| 73. | HSAXq28  | 153138584 | 35 (1) | PTRX  | 159591531 | 35 (1)  |
| 74. | HSAY     | 6832085   | 42 (3) | PTRY  | 7083137   | 36 (3)* |
| 75. | HASY     | 12475024  | 52 (4) | PTRY  | 12939534  | 52 (4)  |

\* ITS inserted in repetitive element, insertion mechanism was defined from repetitive element consensus and included in Table 1 and in Additional data file 6

**Table S7 - Human ITS loci for which the orthologous chimpanzee loci were not found or were grossly rearranged**

|    | Chromosomal localization | Starting nucleotide of ITS | ITS length (mismatches) |
|----|--------------------------|----------------------------|-------------------------|
| 1. | HSA11q1                  | 62571027                   | 55 (3)                  |
| 2. | HSAY                     | 18254397                   | 26 (1)                  |
| 3. | HSAXp11                  | 49665897                   | 55 (4)                  |
