# Supplementary material for: Contribution of telomerase RNA retrotranscription to DNA double-strand break repair during mammalian genome evolution
Source: PubMed Central journal article supplement (PMC2246262; doi:10.1186/gb-2007-8-12-r260), 2007-12-07
Supplement: gb-2007-8-12-r260-S6.pdf [file gb-2007-8-12-r260-S6.pdf]

**Additional data file 6**

**Table S8 - Human and chimpanzee ITS loci with a defined mechanism of insertion**

**A. Human-specific ITS loci**

|    | Human locus localization |                            |                                           | Chimpanzee empty locus organization |                                     | Length of flanking sequence modification | Nucleotides in register with the inserted telomeric array | Insertion mechanism | Ref. |
|----|--------------------------|----------------------------|-------------------------------------------|-------------------------------------|-------------------------------------|------------------------------------------|-----------------------------------------------------------|---------------------|------|
|    | Chromosomal localization | Starting nucleotide of ITS | Length of telomeric sequence (mismatches) | Chromosomal localization            | Starting nucleotide of "empty site" |                                          |                                                           |                     |      |
| 1. | HSA15q14                 | 39959290                   | 34 (0)                                    | PTR16                               | 40004170                            | 0                                        | 0                                                         | No modification     | a    |
| 2. | HSA3q25                  | 160732967                  | 41 (1)                                    | PTR2                                | 164068022                           | 1                                        | 3                                                         | Deletion            | a    |
| 3. | HSA16q22                 | 75147692                   | 41 (0)                                    | PTR18                               | 68324975                            | 5                                        | 4                                                         | "                   | a    |
| 4. | HSA11q24                 | 129111094                  | 32 (1)                                    | PTR9                                | 131211358                           | 7                                        | 2                                                         | Random seq add      | b    |
| 5. | HSA9q34                  | 126292595                  | 55 (0)                                    | PTR11                               | 112827938                           | 15                                       | 1                                                         | Duplication         | b    |

**B. Chimpanzee-specific ITS loci**

|    | Chimpanzee locus localization |                            |                                           | Human empty locus organization |                                     | Length of flanking sequence modification | Nucleotides in register with the inserted telomeric array | Insertion mechanism | Ref. |
|----|-------------------------------|----------------------------|-------------------------------------------|--------------------------------|-------------------------------------|------------------------------------------|-----------------------------------------------------------|---------------------|------|
|    | Chromosomal localization      | Starting nucleotide of ITS | Length of telomeric sequence (mismatches) | Chromosomal localization       | Starting nucleotide of "empty site" |                                          |                                                           |                     |      |
| 1. | PTR13                         | 128434905                  | 34 (0)                                    | HSA2q37                        | 237999141                           | 15                                       | 2                                                         | Deletion            | b    |
| 2. | PTR22                         | 41998107                   | 24 (0)                                    | HSA21q22                       | 41943110                            | 7                                        | 3                                                         | "                   | b    |
| 3. | PTR22                         | 18816173                   | 43 (0)                                    | HSA21q21                       | 18699305                            | 76                                       | ?                                                         | Random seq add      | a    |
| 4. | PTR12                         | 85987285                   | 35 (0)                                    | HSA2p12                        | 83180613                            | 15                                       | 0                                                         | Duplication         | b    |

**C. ITS loci inserted before the human-chimpanzee split**

|    | Human locus localization |                            |                                           | Chimpanzee locus localization |                            |                                           | Length of flanking sequence modification | Nucleotides in register with inserted telomeric array | Insertion mechanism | Ref. |
|----|--------------------------|----------------------------|-------------------------------------------|-------------------------------|----------------------------|-------------------------------------------|------------------------------------------|-------------------------------------------------------|---------------------|------|
|    | Chromosomal localization | Starting nucleotide of ITS | Length of telomeric sequence (mismatches) | Chromosomal localization      | Starting nucleotide of ITS | Length of telomeric sequence (mismatches) |                                          |                                                       |                     |      |
| 1. | HSA6p24                  | 1060028                    | 39 (1)                                    | PTR5                          | 1068621                    | 39 (1)                                    | 0                                        | 2                                                     | No modification     | a    |
| 2. | HSA7q36                  | 151986856                  | 53 (0)                                    | PTR6                          | 17600852                   | 41 (0)                                    | 18                                       | 3                                                     | Deletion            | a    |
| 3. | HSA8p12                  | 35523062                   | 39 (1)                                    | PTR7                          | 36796288                   | 39 (1)                                    | 23                                       | 3                                                     | "                   | a    |
| 4. | HSA9p24                  | 2814045                    | 37 (0)                                    | PTR11                         | 2778776                    | 25 (0)                                    | 42                                       | 0                                                     | "                   | a    |
| 5. | HSA7q36                  | 154981811                  | 50 (3)                                    | PTR6                          | 157876908                  | 62 (3)                                    | 8                                        | ?                                                     | Random seq add      | a    |
| 6. | HSA2q31                  | 182343128                  | 69 (1)                                    | PTR13                         | 71716824                   | 57 (1)                                    | 43                                       | 2                                                     | Duplication         | a    |
| 7. | HSA5q14                  | 82896052                   | 41 (2)                                    | PTR4                          | 32318230                   | 23 (0)                                    | 15                                       | 15                                                    | "                   | a    |

**D. ITS loci conserved in human and chimpanzee and inserted within repetitive elements**

|    | Human locus localization |                            |                                           | Chimpanzee locus localization |                            |                                           | Repetitive element organization                       |                                          |                                                       | Insertion mechanism | Ref. |
|----|--------------------------|----------------------------|-------------------------------------------|-------------------------------|----------------------------|-------------------------------------------|-------------------------------------------------------|------------------------------------------|-------------------------------------------------------|---------------------|------|
|    | Chromosomal localization | Starting nucleotide of ITS | Length of telomeric sequence (mismatches) | Chromosomal localization      | Starting nucleotide of ITS | Length of telomeric sequence (mismatches) | Interrupted repetitive element (insertion breakpoint) | Length of flanking sequence modification | Nucleotides in register with inserted telomeric array |                     |      |
| 1. | HSA2q37                  | 233522426                  | 25 (1)                                    | PTR13                         | 123736397                  | 37 (2)                                    | L1MB2#LINE/L1 (753)                                   | 0                                        | 3                                                     | No modification     | b    |
| 2. | HSA7q36                  | 6832085                    | 42 (3)                                    | PTRY                          | 7083137                    | 36 (3)                                    | MER41B#LTR/ERV1 (349)                                 | 0                                        | 0                                                     | "                   | b    |
| 3. | HSA1p34                  | 41160952                   | 44 (2)                                    | PTR1                          | 42378933                   | 38 (2)                                    | MIRb#SINE/MIR (41)                                    | 2                                        | 0                                                     | Deletion            | b    |
| 4. | HSA2q37                  | 241482028                  | 35 (0)                                    | PTR13                         | 35180448                   | 88 (2)                                    | L1M4_orf2#LINE/L1 (1532)                              | 10                                       | 0                                                     | "                   | b    |
| 5. | HSA12p13                 | 87553                      | 35 (0)                                    | PTR10                         | 105275                     | 29 (0)                                    | HERVP71A#LTR/ER (4270)                                | 6                                        | 1                                                     | "                   | b    |
| 6. | HSA12p11                 | 22285277                   | 35 (1)                                    | PTR10                         | 22919421                   | 35 (1)                                    | AluJb#SINE/Alu (223)                                  | 6                                        | 0                                                     | "                   | b    |
| 7. | HSA15q22                 | 69007769                   | 28 (2)                                    | PTR16                         | 69709477                   | 28 (2)                                    | L1M4_5end#LINE/L1 (687)                               | 13                                       | 4                                                     | "                   | b    |
| 8. | HSA20p12                 | 10167184                   | 34 (1)                                    | PTR21                         | 9984464                    | 34 (2)                                    | L2#LINE/L2 (2584)                                     | 1                                        | 0                                                     | "                   | b    |
| 9. | HSA19q13                 | 21981095                   | 38 (4)                                    | PTR20                         | 22928526                   | 38 (5)                                    | HERV70#LTR/ERV1 (2077)                                | 7                                        | 0                                                     | Random seq add      | b    |

a Nergadze et al., 2004

b This paper
